# Supplementary material for: Menadione Contribution to the In Vitro Radical Scavenging Potential of Phytochemicals Naringenin and Lignin
Source: MDPI journal article supplement (doi:10.3390/ijms242216268), 2023-11-13
Supplement: s1 [file s1]

# Menadione Contribution to the In Vitro Radical Scavenging Potential of Phytochemicals Naringenin and Lignin

Zvezdelina Yaneva <sup>1,\*</sup>, Donika Ivanova <sup>1</sup>, Monika Toneva <sup>1</sup>, Milena Tsanova <sup>2</sup>, Vanya Marutsova <sup>3</sup> and Neli Grozeva <sup>2</sup>

<sup>1</sup> Department of Pharmacology, Animal Physiology, Biochemistry and Chemistry, Faculty of Veterinary Medicine, Trakia University, Students Campus, 6000 Stara Zagora, Bulgaria; donika.ivanova@trakia-uni.bg (D.I.); monika.toneva@trakia-uni.bg (M.T.)

<sup>2</sup> Department of Biological Sciences, Faculty of Agriculture, Trakia University, Students Campus, 6000 Stara Zagora, Bulgaria; milena.tsanova@trakia-uni.bg (M.T.); n.grozeva@trakia-uni.bg (N.G.)

<sup>3</sup> Department of Internal Diseases, Faculty of Veterinary Medicine, Trakia University, Student Campus, 6000 Stara Zagora, Bulgaria; vanya.marutsova@trakia-uni.bg

\* Correspondence: zvezdelina.yaneva@trakia-uni.bg

**Table S1.** Statistical significance (p-values matrix) of the experimental data for the DPPH radical scavenging activity of the single, two- and three-component solutions.

| <i>Variables</i>                                                                     | <i>lignin</i> | <i>naringenin</i> | <i>vitamin K<sub>3</sub></i> | <i>double combination<br/>lignin/naringenin<br/>(1:1, v/v)</i> | <i>double<br/>combination<br/>vitamin K<sub>3</sub>/lignin<br/>(1:1, v/v)</i> | <i>double<br/>combination<br/>vitamin<br/>K<sub>3</sub>/naringenin<br/>(1:1, v/v)</i> | <i>triple combination<br/>vitamin<br/>K<sub>3</sub>/lignin/naringenin<br/>(1:1:1, v/v/v)</i> |
|--------------------------------------------------------------------------------------|---------------|-------------------|------------------------------|----------------------------------------------------------------|-------------------------------------------------------------------------------|---------------------------------------------------------------------------------------|----------------------------------------------------------------------------------------------|
| <i>lignin</i>                                                                        | 0             | <b>0.015</b>      | 0.053                        | 0.194                                                          | 0.178                                                                         | 0.053                                                                                 | <b>0.048</b>                                                                                 |
| <i>naringenin</i>                                                                    | <b>0.015</b>  | 0                 | <b>0.039</b>                 | 0.180                                                          | 0.164                                                                         | <b>0.039</b>                                                                          | <b>0.034</b>                                                                                 |
| <i>vitamin K<sub>3</sub></i>                                                         | 0.053         | <b>0.039</b>      | 0                            | 0.141                                                          | 0.125                                                                         | <b>&lt; 0.0001</b>                                                                    | <b>0.005</b>                                                                                 |
| <i>double combination<br/>lignin/naringenin (1:1, v/v)</i>                           | 0.194         | 0.180             | 0.141                        | 0                                                              | <b>0.016</b>                                                                  | 0.141                                                                                 | 0.146                                                                                        |
| <i>double combination vitamin<br/>K<sub>3</sub>/lignin (1:1, v/v)</i>                | 0.178         | 0.164             | 0.125                        | <b>0.016</b>                                                   | 0                                                                             | 0.125                                                                                 | 0.130                                                                                        |
| <i>double combination vitamin<br/>K<sub>3</sub>/naringenin (1:1, v/v)</i>            | 0.053         | <b>0.039</b>      | <b>&lt; 0.0001</b>           | 0.141                                                          | 0.125                                                                         | 0                                                                                     | <b>0.005</b>                                                                                 |
| <i>triple combination vitamin<br/>K<sub>3</sub>/lignin/naringenin (1:1:1, v/v/v)</i> | <b>0.048</b>  | <b>0.034</b>      | <b>0.005</b>                 | 0.146                                                          | 0.130                                                                         | <b>0.005</b>                                                                          | 0                                                                                            |

Values in bold are different from 0 with a significance level  $p \leq 0.05$ .

**Table S2.** Statistical significance (p-values matrix) of the experimental data for the ABTS radical scavenging activity of the single, two- and three-component solutions.

| <i>Variables</i>                                                                     | <i>lignin</i> | <i>naringenin</i> | <i>vitamin K<sub>3</sub></i> | <i>double combination<br/>lignin/naringenin<br/>(1:1, v/v)</i> | <i>double<br/>combination<br/>vitamin<br/>K<sub>3</sub>/lignin (1:1,<br/>v/v)</i> | <i>double<br/>combination<br/>vitamin<br/>K<sub>3</sub>/naringenin<br/>(1:1, v/v)</i> | <i>triple combination<br/>vitamin<br/>K<sub>3</sub>/lignin/naringenin<br/>(1:1:1, v/v/v)</i> |
|--------------------------------------------------------------------------------------|---------------|-------------------|------------------------------|----------------------------------------------------------------|-----------------------------------------------------------------------------------|---------------------------------------------------------------------------------------|----------------------------------------------------------------------------------------------|
| <i>lignin</i>                                                                        | 0             | <b>0.040</b>      | 0.069                        | 0.094                                                          | 0.084                                                                             | 0.117                                                                                 | <b>0.033</b>                                                                                 |
| <i>naringenin</i>                                                                    | <b>0.040</b>  | 0                 | 0.110                        | 0.135                                                          | 0.124                                                                             | 0.076                                                                                 | 0.073                                                                                        |
| <i>vitamin K<sub>3</sub></i>                                                         | 0.069         | 0.110             | 0                            | <b>0.025</b>                                                   | <b>0.014</b>                                                                      | 0.186                                                                                 | <b>0.036</b>                                                                                 |
| <i>double combination lignin/naringenin<br/>(1:1, v/v)</i>                           | 0.094         | 0.135             | <b>0.025</b>                 | 0                                                              | <b>0.011</b>                                                                      | 0.211                                                                                 | 0.061                                                                                        |
| <i>double combination vitamin K<sub>3</sub>/lignin<br/>(1:1, v/v)</i>                | 0.084         | 0.124             | <b>0.014</b>                 | <b>0.011</b>                                                   | 0                                                                                 | 0.201                                                                                 | 0.051                                                                                        |
| <i>double combination vitamin<br/>K<sub>3</sub>/naringenin (1:1, v/v)</i>            | 0.117         | 0.076             | 0.186                        | 0.211                                                          | 0.201                                                                             | 0                                                                                     | 0.150                                                                                        |
| <i>triple combination vitamin<br/>K<sub>3</sub>/lignin/naringenin (1:1:1, v/v/v)</i> | <b>0.033</b>  | 0.073             | <b>0.036</b>                 | 0.061                                                          | 0.051                                                                             | 0.150                                                                                 | 0                                                                                            |

Values in bold are different from 0 with a significance level  $p \leq 0.05$ .
